# Supplementary material for: Bispecific Antibody Affords Complete Post-Exposure Protection of Mice from Both Ebola (Zaire) and Sudan Viruses
Source: PubMed Central journal article supplement (PMC4725817; doi:10.1038/srep19193), 2016-01-13
Supplement: srep19193-s1.pdf [file srep19193-s1.pdf]

**Supplementary Information for:**

**Bispecific Antibody Affords Complete Post-Exposure Protection of Mice from Both Ebola (Zaire) and Sudan Viruses**

Julia C. Frei,<sup>1\*</sup> Elisabeth K. Nyakatura,<sup>1\*</sup> Samantha E. Zak,<sup>2\*</sup> Russell R. Bakken,<sup>2</sup> Kartik Chandran,<sup>3</sup> John M. Dye,<sup>2</sup> and Jonathan R. Lai<sup>1</sup>

<sup>1</sup> Department of Biochemistry, Albert Einstein College of Medicine, 1300 Morris Park Ave., Bronx, NY 10461. <sup>2</sup> Virology Division, United States Army Medical Research Institute of Infectious Disease, 1425 Porter Street, Fort Detrick, MD 21702. <sup>3</sup> Department of Microbiology and Immunology, Albert Einstein College of Medicine, 1300 Morris Park Ave., Bronx, NY 10461.

\* These authors contributed equally to this work.

Correspondence and requests for materials should be addressed to J. M. D. ([john.m.dye1.civ@mail.mil](mailto:john.m.dye1.civ@mail.mil)) or J. R. L. ([jon.lai@einstein.yu.edu](mailto:jon.lai@einstein.yu.edu))

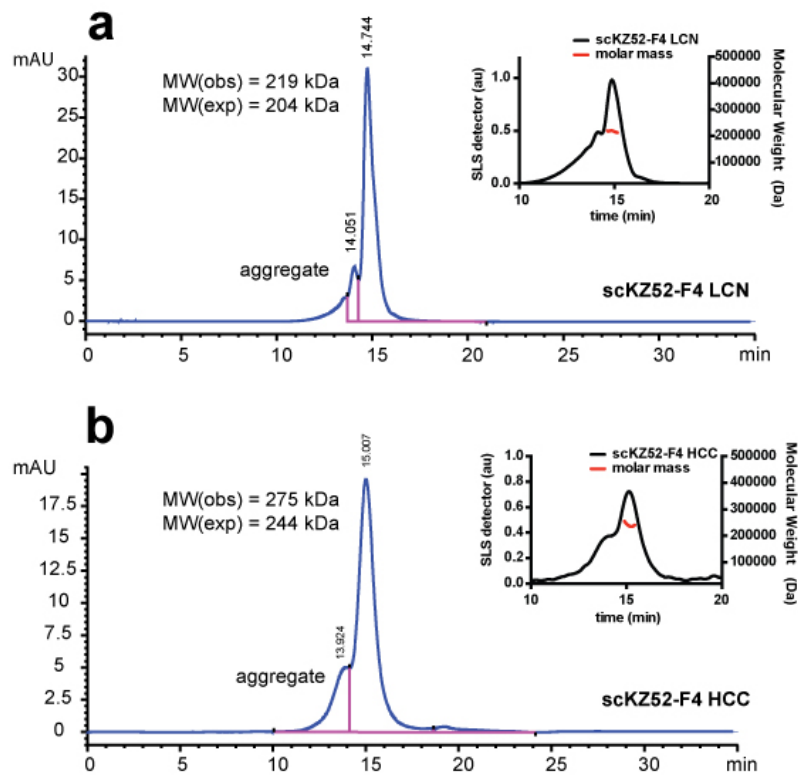

**Supplementary Figure 1. Size exclusion chromatography-multiangle light scattering (SEC-MALS) analysis of Bis-mAbs.** scKZ52-F4 LCN (a) and scKZ52-F4 HCC (b) were analyzed on an Agilent BioSec 5 in 150 mM HEPES buffer, pH 7.4, 200 mM NaCl. Absorbance was monitored at 280 nm. Molecular weight estimates from MALS shown in inset.

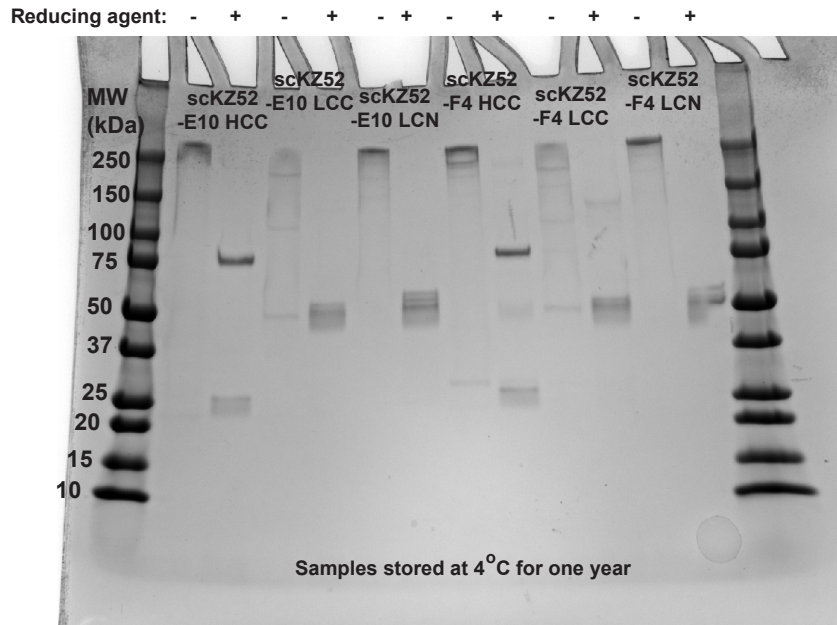

Supplementary Figure 2. SDS-PAGE analysis of Bis-mAbs after storage at 4 °C for one year.

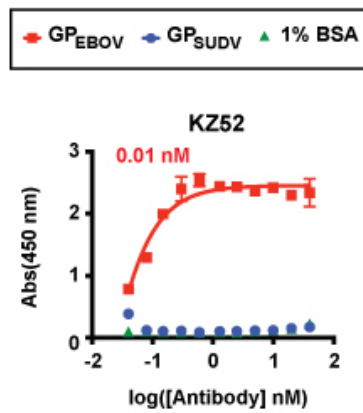

Supplementary Figure 3. ELISA of KZ52 IgG for GP and 1% BSA control.

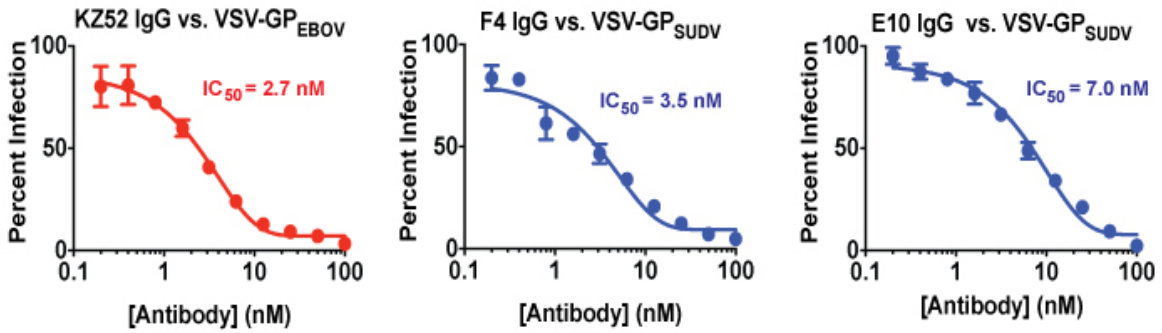

**Supplementary Figure 4. Neutralization of VSV-GP by monospecific mAbs KZ52 (EBOV), F4 and E10 (SUDV)**

**Supplementary Table 1. Single-phase bioayer interferometry (BLI) analysis of scKZ52-F4.**

| Analyte            | $k_a$ ( $M^{-1} \text{sec}^{-1}$ ) | $k_d$ ( $\text{sec}^{-1}$ )     | $K_D$ (nM)  |
|--------------------|------------------------------------|---------------------------------|-------------|
| GP <sub>EBOV</sub> | $(3.7 \pm 0.1) \times 10^3$        | $(8.7 \pm 0.3) \times 10^{-4}$  | $240 \pm 8$ |
| GP <sub>SUDV</sub> | $(6.4 \pm 0.1) \times 10^4$        | $(1.1 \pm 0.01) \times 10^{-2}$ | $170 \pm 3$ |
